# Supplementary material for: Anti-Inflammatory and Anti-Fibrotic Effect of Immortalized Mesenchymal-Stem-Cell-Derived Conditioned Medium on Human Lung Myofibroblasts and Epithelial Cells
Source: MDPI journal article supplement (doi:10.3390/ijms23094570), 2022-04-20
Supplement: s1 [file s1]

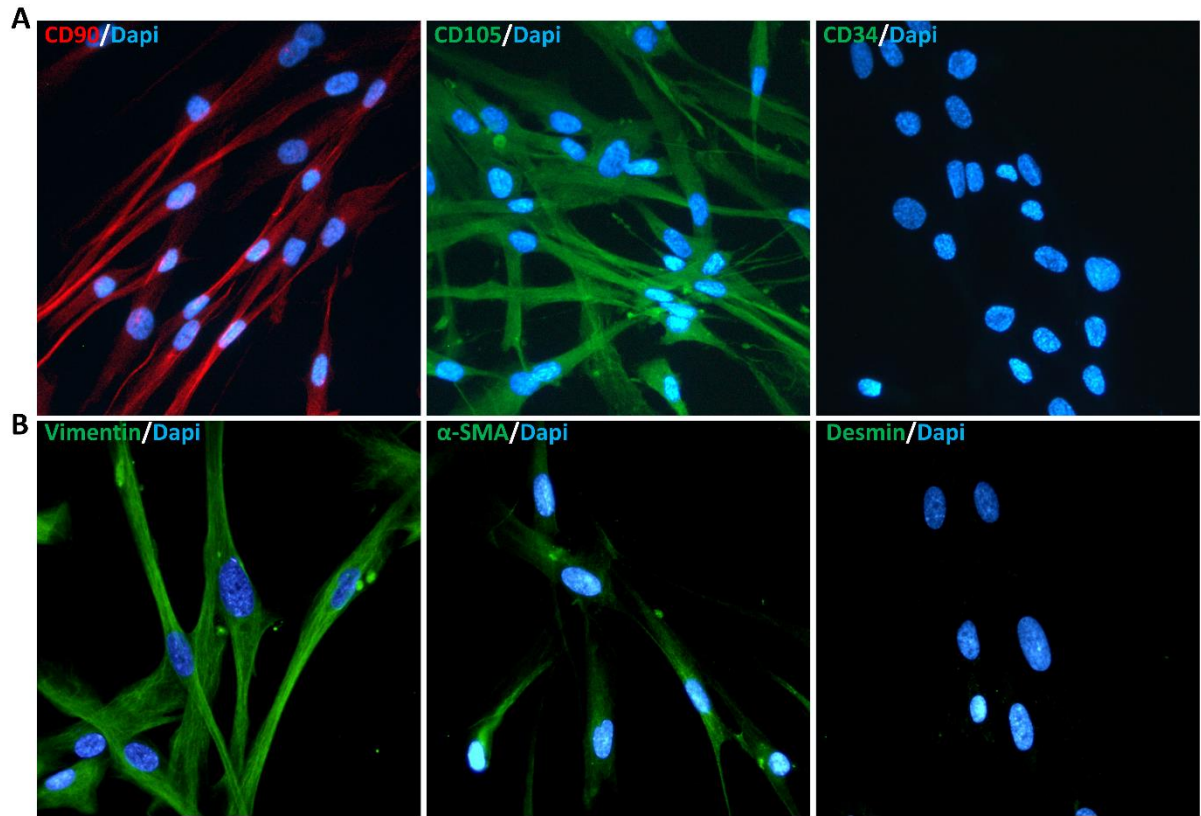

**Figure S1.** Characterization of ADSCs and hPSMs. (A) ADSCs were found to be positive for CD90 and CD105 and negative for CD34. (B) hPSMs were found to be positive for vimentin and  $\alpha$ -SMA and negative for desmin. Representative 400 $\times$  immunofluorescence snapshots are shown. Blue and red/green colors correspond to DAPI and antibody staining, respectively.
